# Supplementary material
Source: PubMed Central journal article supplement (PMC4250366)
Supplement: me-14-1229.pdf [file me-14-1229.pdf]

## Supplemental Figure 1

**sFigure 1.** Western blot for ERs. The samples were loaded on 10% Tris-Glycine SDS-PAGE gel. The protein levels were detected by anti-ER $\alpha$  (clone: HC-20, 1:500 dilution) or anti-ER $\beta$  (clone: H-150, 1:500 dilution). The immunoreactive products were detected by Fc ODYSSEY image system (LI-COR Biosciences).  $\alpha$ -Tubulin was used as a loading control.

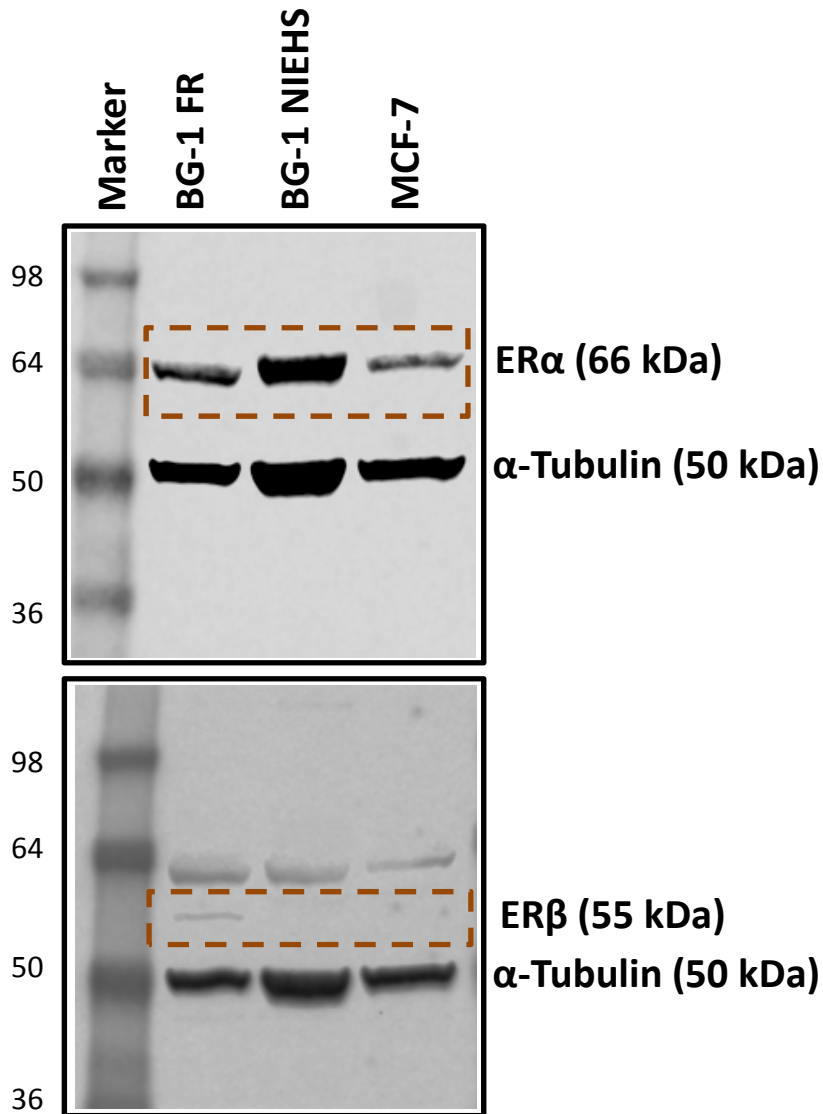

Marker: SeeBlue Plus2 Pre-Stained Standard (Invitrogen)

## Supplemental Table 1

sTable 1. Real-time PCR primers used in this study

| <b>Gene symbol and GenBank accession number</b>   | <b>Sequence (5' – 3')</b>                              |
|---------------------------------------------------|--------------------------------------------------------|
| Human <i>ESR1</i> (NM_000125)                     | F: TAGAGGGCATGGTGGAGATCT<br>R: CAAACTCCTCTCCCTGCAGAT   |
| Human <i>ESR2</i> (NM_001040275)                  | F: GCCGACAAGGAGTTGGTACAC<br>R: CAGGCTGAGCTCCACAAAGC    |
| Human <i>FBLN1C</i> (NM_001996)                   | F: CCGCTGCCTGGCCTTCGA<br>R: CCTCCTCATTGCCGCCG          |
| Human <i>CLDN3</i> (NM_001306)                    | F: AACACCATTATCCGGGACTTCT<br>R: GCGGAGTAGACGACCTTGG    |
| Human <i>GREB1</i> (NM_014668)                    | F: CAAAGAATAACCTGTTGGCCC<br>R: GACATGCCTGCGCTCTCATAC   |
| Human <i>PGR</i> (NM_000926.4)                    | F: GACGTGGAGGGCGCATAT<br>R: GCAGTCCGCTGTCCTTTTCT       |
| Human <i>pS2/TFF1</i> (NM_003225.2)               | F: GCCCTCCCAGTCTGCAAATA<br>R: CTGGAGGGACGTCGATGGTA     |
| Human <i>WSP2</i> (NM_003881)                     | F: TGAGCGGCACACCGAAGAC<br>R: ACAGCCATCCAGCACCAG        |
| Human <i><math>\beta</math>-actin</i> (NM_001101) | F: GACAGGATGCAGAAGGAGATCAC<br>R: GCTGATCCACATCTGCTGGAA |

## Supplemental Table 2

sTable 2. Translocations identified in MCF-7 and BG-1 NIEHS

| Published report (ref. 47) | MCF-7 (used in this study)         | BG-1 NIEHS                   | Cell specific translocation |
|----------------------------|------------------------------------|------------------------------|-----------------------------|
| der(1)t(1;21)t(9;21)       |                                    |                              |                             |
|                            | <b>del(1q) not all cells</b>       |                              | <b>MCF-7</b>                |
|                            | der(1)t(1;20;9)                    | der(1)t(1;20;9)              |                             |
| -1                         |                                    |                              |                             |
| der(2)t(2;3)(q34;?)        | der(2)t(2;3)(q34;?)                | der(2)t(2;3)(q34;?)          |                             |
| +2                         | +2                                 | +2                           |                             |
| +3                         |                                    |                              |                             |
| del(3)(p14)                | <b>del(3)(p14)</b>                 |                              | <b>MCF-7</b>                |
| der(3)t(3;11)(p14q13)      | der(3)t(3;11;3)(p14q13q11)         | der(3)t(3;11;3)(p14q13q11)   |                             |
| -4                         |                                    |                              |                             |
|                            | der(4)t(4;8)                       | der(4)t(4;8)                 |                             |
| -5                         |                                    | <b>del(5p) not all cells</b> | <b>BG-1 NIEHS</b>           |
| +5                         | +5                                 | +5                           |                             |
|                            | der(5)t(5;9)                       | der(5)t(9;5)                 |                             |
| +6                         | +6                                 | +6                           |                             |
| der(6)t(6;17;16)(q25;21;?) |                                    |                              |                             |
| del(6)(q25)                |                                    |                              |                             |
|                            | <b>der(6)t(6;14) not all cells</b> |                              | <b>MCF-7</b>                |
|                            | der(6)t(6;3)                       | der(6)t(6;3)                 |                             |
| dup(7)(p13p15)             |                                    |                              |                             |
| der(7)t(1;7)(?;p15)        | <b>der(7)t(1;11;7)</b>             |                              | <b>MCF-7</b>                |
|                            |                                    | <b>der(7)t(1;15;7)</b>       | <b>BG-1 NIEHS</b>           |
| der(20)t(7;20)t(1;7)t(1;7) | der(7)t(7;20;1)                    | der(7)t(1;20;15;7)           |                             |
|                            |                                    | <b>der(7)t(10;7)</b>         | <b>BG-1 NIEHS</b>           |
| der(8)t(8;15)(p11;?)       | der(8)t(8;15)(p11;?)x2             | der(8)t(8;15)(p11;?)x2       |                             |
| -8                         | -8                                 | -8                           |                             |
|                            | der(8)t(1;8)                       | der(8)t(1;8)                 |                             |
| -9                         |                                    |                              |                             |
| +9                         |                                    |                              |                             |
|                            | der(9)t(9;8)                       | der(9)t(9;8)                 |                             |
| del(10)t(7;10)(?;p14)      | del(10)t(7;10)(?;p14)x2            | del(10)t(7;10)(?;p14)        |                             |
|                            |                                    | <b>der(10)t(10;22)</b>       | <b>BG-1 NIEHS</b>           |
|                            |                                    | <b>der(10)t(10;12;14)</b>    | <b>BG-1 NIEHS</b>           |
| -11                        |                                    |                              |                             |
| +12                        | +del(12)(q24qter)                  | +del(12)(q24qter)            |                             |
| der(12)t(8;12)(q11;p11)    | der(12)t(8;12)(q11;p11)            | der(12)t(8;12)(q11;p11)      |                             |
|                            | del(13)                            | del(13)                      |                             |
|                            | der(13)t(13;15)                    | der(13)t(13;15)              |                             |
|                            | der(13)t(16;13)                    |                              | <b>MCF-7</b>                |
|                            |                                    | <b>del(14)</b>               | <b>BG-1 NIEHS</b>           |
| +14                        | +14                                | +14                          |                             |
|                            | der(15)t(15;3)                     | der(15)t(15;3)               |                             |
|                            | der(15)t(15;16)                    | der(15)t(15;16)              |                             |
|                            | der(16)t(16;15)                    | der(16)t(16;15)              |                             |
|                            | del(16)                            | del(16)                      |                             |
| der(16)t(8;16)(q?;q11.2)   | der(16)t(8;16)(q?;q11.2)           | der(16)t(8;16)(q?;q11.2)     |                             |
| der(16)t(16;19)(q21;?)     |                                    | <b>der(19)t(19;11;16)</b>    |                             |
| der(17)t(17;19)(p11.1;p12) | der(17)t(17;19)(p11.1;p12)         | der(17)t(17;19;1)            |                             |
| der(17)t(8;17)t(1;8)       | <b>der(17)t(17;19;15)</b>          |                              | <b>MCF-7</b>                |
|                            | der(17)t(17;20;1)                  | der(17)t(17;20;1)            |                             |
|                            | del(18)                            | del(18)                      |                             |
| der(19)t(12;19)(q13;q13.3) | der(19)t(12;19)(q13;q13.3)         | der(19)t(12;19)(q13;q13.3)   |                             |
|                            |                                    | <b>der(19)t(19;11;17)</b>    | <b>BG-1 NIEHS</b>           |
|                            | del(20)(pterp11)                   | del(20)(pterp11)             |                             |
| -20                        | -20                                | -20                          |                             |
|                            | der(20)t(20;11)                    | der(20)t(20;1;11;3)          |                             |
|                            | der(20)t(20;3)                     |                              |                             |
|                            | der(20)t(20;16;6)                  | der(20)t(17;1;11;20)         |                             |
|                            | <b>+21</b>                         |                              | <b>MCF-7</b>                |
|                            |                                    | <b>der(21)t(3;21)</b>        | <b>BG-1 NIEHS</b>           |
|                            | der(22)t(7;22)                     | der(22)t(7;22)               |                             |
| der(X)dup(X)(q21qter)      | der(X)dup(X)(q21qter)              | der(X)dup(X)(q21qter)        |                             |



## Supplemental Table 4

sTable 4. INGENUITY pathway analysis – Top 3 Molecular and cellular functions

| Analysis of E2-responsive 274 genes only in BG-1 FR cells     |         |                     |
|---------------------------------------------------------------|---------|---------------------|
| Categories                                                    | # genes | p-value             |
| 1. Cellular growth and proliferation                          | 91      | 3.48E-08 - 7.07E-03 |
| 2. Cell death and survival                                    | 89      | 5.80E-11 - 8.20E-03 |
| 3. Cellular development                                       | 85      | 5.55E-08 - 7.53E-03 |
| Analysis of E2-responsive 1509 genes only in BG-1 NIEHS cells |         |                     |
| Categories                                                    | # genes | p-value             |
| 1. Cellular development                                       | 243     | 2.98E-05 - 4.45E-03 |
| 2. Cell function and maintenance                              | 151     | 6.02E-05 - 3.95E-03 |
| 3. Cell morphology                                            | 140     | 7.91E-05 - 3.83E-03 |
| Analysis of E2-responsive 1453 genes only in MCF-7 cells      |         |                     |
| Categories                                                    | # genes | p-value             |
| 1. Cellular growth and proliferation                          | 321     | 6.20E-05 - 1.88E-02 |
| 2. Cellular development                                       | 266     | 6.20E-05 - 1.88E-02 |
| 3. Cell cycle                                                 | 148     | 2.70E-06 - 1.90E-02 |

## Supplemental Table 5

sTable 5. A list of publications which used BG-1 NIEHS cells

| Published year | First author        | Journal                                           |
|----------------|---------------------|---------------------------------------------------|
| 2014           | Kim JY              | <i>Environ Toxicol Pharmacol</i> 37(3):1264-74    |
| 2014           | Park MA             | <i>Chem Res Toxicol</i> 27(1):119-28              |
| 2013           | Hwang KA            | <i>Toxicol Appl Pharmacol</i> 272(3):637-46       |
| 2013           | Kang NH             | <i>Food Chem Toxicol</i> 59:373-9                 |
| 2013           | Park MA             | <i>Toxicology</i> 305 (8):41-8                    |
| 2013           | Hwang KA            | <i>Int J Oncol</i> 42(2):733-40                   |
| 2012           | Kang NH             | <i>Mol Med Rep</i> 6(1):151-6                     |
| 2012           | Park MA             | <i>Mol Med Rep</i> 5(3):761-6                     |
| 2012           | Wang S              | <i>J Steroid Biochem Mol Biol</i> 128(3-5):98-106 |
| 2011           | Park MA             | <i>Toxicol Res</i> 27(4):253-9                    |
| 2011           | Hwang KA            | <i>Lab Anim Res</i> 27(2):99-107                  |
| 2011           | Choi JH             | <i>Carcinogenesis</i> 32(4):589-96                |
| 2009           | Park SH             | <i>J Reprod Dev</i> 55(1):23-9                    |
| 2008           | Hsu EL              | <i>Cancer Lett</i> 265(1):113-23                  |
| 2004           | Srinivas G          | <i>Mol Carcinog</i> 39(1):15-25.                  |
| 2003           | Hall JM             | <i>Mol Endocrinol</i> 17(5):792-803               |
| 2002           | Rushing SR          | <i>Arch Biochem Biophys</i> 403(2):189-201        |
| 2002           | Rogers JM           | <i>Mol Pharmacol</i> 61(6):1393-403               |
| 2001           | Greenberger LM      | <i>Clin Cancer Res</i> 7(10):3166-77              |
| 2000           | Annab LA            | <i>Breast Cancer Res</i> 2(2):139-48              |
| 2000           | Rogers JM           | <i>In Vitro Mol Toxicol</i> 13(1):67-82           |
| 1999           | Petranka J          | <i>J Pineal Res</i> 26(3):129-36.                 |
| 1998           | Baldwin WS          | <i>Carcinogenesis</i> 19(11):1895-900             |
| 1998           | Baldwin WS          | <i>In Vitro Cell Dev Biol Anim</i> 34(8):649-54.  |
| 1998           | Romagnolo D         | <i>Mol Carcinog</i> 22(2):102-9.                  |
| 1996           | Ignar-Trowbridge DM | <i>Endocrinology</i> 137(5):1735-44               |
